# Supplementary material
Source: HighWire-hosted journal article supplement (https://heart.bmj.com/content/109/10/771)
Supplement: inline-supplementary-material-1 [file inline-supplementary-material-1.pdf]

## Supplemental Material

**Title:** Prognosis of patients with hypertrophic cardiomyopathy and low-normal left ventricular ejection fraction

You-Jung Choi,<sup>1,2</sup> Hyung-Kwan Kim,<sup>2,3,\*</sup> In-Chang Hwang,<sup>2,4,\*</sup> Chan Soon Park,<sup>2,3</sup> Tae-Min Rhee,<sup>2,3</sup> Hyun-Jung Lee,<sup>2,3</sup> Jun-Bean Park,<sup>2,3</sup> Yeonyee E Yoon,<sup>2,4</sup> Seung-Pyo Lee,<sup>2,3</sup> Goo-Yeong Cho,<sup>2,4</sup> Yong-Jin Kim<sup>2,3</sup>

<sup>1</sup> Division of Cardiology, Department of Internal Medicine, Korea University Guro Hospital, 148, Gurodong-ro, Guro-gu, Seoul, Republic of Korea.

<sup>2</sup> Department of Internal Medicine, Seoul National University College of Medicine, 103, Daehak-ro, Jongno-gu, Seoul, Republic of Korea.

<sup>3</sup> Division of Cardiology, Department of Internal Medicine, Seoul National University Hospital, 101 Daehak-ro, Jongno-gu, Seoul, Republic of Korea.

<sup>4</sup> Division of Cardiology, Department of Internal Medicine, Cardiovascular Center, Seoul National University Bundang Hospital, 82, Gumi-ro 173 beon-gil, Bundang-gu, Seongnam-si, Gyeonggi-do, Republic of Korea.

\*Two authors contributed equally to this work as the last authors.

### Correspondence to:

Hyung-Kwan Kim, MD, PhD

Section of CV Imaging, Division of Cardiology, Department of Internal Medicine,  
Seoul National University College of Medicine, Seoul National University Hospital  
101 Daehak-ro, Jongno-gu, Seoul 03080, Republic of Korea

Fax: +82-2-762-9622, Tel: +82-2-2072-0243, Email: cardiman73@gmail.com or  
hkkim73@snu.ac.kr

In-Chang Hwang, MD

Cardiovascular Center, Division of Cardiology, Department of Internal Medicine,  
Seoul National University College of Medicine, Seoul National University Bundang Hospital  
82, Gumi-ro 173 beon-gil, Bundang-gu, Seongnam-si, Gyeonggi-do 13620, Republic of  
Korea

Fax: +82-31-787-4290, Tel: +82-31-787-7065, Email: inchang.hwang@gmail.com

## Detailed Methods

### *Study population*

This cohort study recruited 1936 consecutive patients diagnosed with hypertrophic cardiomyopathy (HCM) between 2008 and 2019 from two tertiary university hospitals. HCM was diagnosed by only experienced cardiologists who have more than 10 years of clinical and echocardiographic experience, based on the guidelines (1). All echocardiographic images were thoroughly reviewed and double-checked. In cases where HCM diagnosis was ambiguous, cardiac magnetic resonance imaging was performed in cooperation with cardiovascular radiologists. Additionally, in order to verify HCM diagnosis, we re-confirmed the diagnosis of HCM based on the morphology of left ventricular (LV) hypertrophy pattern (apical, asymmetrical septal hypertrophy, etc.), as well as the extent of blood pressure control.

We applied the following exclusion criteria: competitive sports and other causes of LV hypertrophy, such as Noonan syndrome, Fabry disease, glycogen storage disease, cardiac amyloidosis, and mitochondrial disease; and eligibility for secondary prevention of sudden cardiac death (SCD) (i.e., history of spontaneous ventricular tachycardia, ventricular fibrillation, or cardiac arrest) or ischemic cardiomyopathy (i.e., LV ejection fraction [LVEF]  $\leq$  40% with a history of myocardial infarction, percutaneous coronary intervention, or coronary artery bypass surgery). Based on these criteria, 22 patients were excluded because they were candidates for secondary prevention and four because they had combined ischemic cardiomyopathy. Additionally, 49 patients were excluded due to inadequate echocardiographic data and five due to lack of data for follow-up.

### *Risk factors for SCD and 5-year HCM Risk-SCD score*

All patients had undergone a comprehensive personal and family history and physical examination at baseline. The following factors were systematically assessed to determine the 5-year Risk-SCD scores (1); (i) age at initial evaluation, (ii) family history of SCD, defined as SCD in one or more first-degree relatives under 40 years of age or in a first-degree relative with confirmed HCM at any age, (iii) the history of unexplained syncope, (iv) non-sustained ventricular tachycardia, documented by 24-hour Holter monitoring or pacemaker/ICD recording, which was defined as  $\geq 3$  beats at a rate of  $\geq 120$  beats per minute, and lasting  $< 30$  seconds; and (v) echocardiographic parameters including maximal LV outflow tract pressure gradient (mmHg), maximal LV wall thickness (mm), and left atrial dimension (mm).

LV wall thickness was assessed at end-diastole using two-dimensional echocardiography, and maximal LV wall thickness was measured as the thickest segment of the LV wall (2). The left atrial anteroposterior dimension was measured at end-systole from the parasternal view. The maximal LV outflow tract pressure gradient was recorded as the largest value using continuous-wave Doppler at rest and/or during the Valsalva manoeuvre.

#### *Definition of primary and secondary outcomes*

The primary endpoint was a composite of SCD and equivalent events, including documented ventricular tachycardia/fibrillation, appropriate implantable cardioverter-defibrillator (ICD) shocks, and aborted SCD. SCD was defined as an unexpected, witnessed arrest within hours of the patient being in a previously stable clinical condition or within 1 hour of a new onset of any symptom that could be interpreted as originating in the heart. Death occurring in bed overnight with no antecedent history of worsening symptoms was also considered SCD and aborted SCD was considered a successful resuscitation after cardiac arrest (3). An ICD shock was considered appropriate if the tachyarrhythmia had originated from the ventricle,

documented by stored electrocardiographic data. Patients with an ICD were evaluated regularly by an experienced electrophysiologist (4). The secondary endpoints were hospitalization for heart failure (HHF), cardiovascular death, and all-cause death. HHF was defined as hospitalizing a patient with new or worsening symptoms and/or signs of heart failure requiring new heart failure medication or the addition of intravenous medications for improvement (5).

Deaths and their causes were ascertained using the National Death Registration Records of Korea and/or witness interviews in the case of death outside of the hospital and using hospital electrical medical records in the case of death in the hospital. Patients were censored when they underwent heart transplantation due to end-stage HCM.

## Reference

1. Elliott PM, Anastasakis A, Borger MA, et al. 2014 ESC Guidelines on diagnosis and management of hypertrophic cardiomyopathy: the Task Force for the Diagnosis and Management of Hypertrophic Cardiomyopathy of the European Society of Cardiology (ESC). *Eur Heart J* 2014;35:2733-79.
2. Nagueh SF, Bierig SM, Budoff MJ, et al. American Society of Echocardiography clinical recommendations for multimodality cardiovascular imaging of patients with hypertrophic cardiomyopathy: Endorsed by the American Society of Nuclear Cardiology, Society for Cardiovascular Magnetic Resonance, and Society of Cardiovascular Computed Tomography. *J Am Soc Echocardiogr* 2011;24:473-98.
3. Elliott PM, Poloniecki J, Dickie S, et al. Sudden death in hypertrophic cardiomyopathy: identification of high risk patients. *J Am Coll Cardiol* 2000;36:2212-8.
4. Choi YJ, Kim HK, Lee SC, et al. Validation of the hypertrophic cardiomyopathy risk-sudden cardiac death calculator in Asians. *Heart* 2019;105:1892-7.
5. McDonagh TA, Metra M, Adamo M, et al. 2021 ESC Guidelines for the diagnosis and treatment of acute and chronic heart failure. *Eur Heart J* 2021;42:3599-726.

**Supplemental Figures**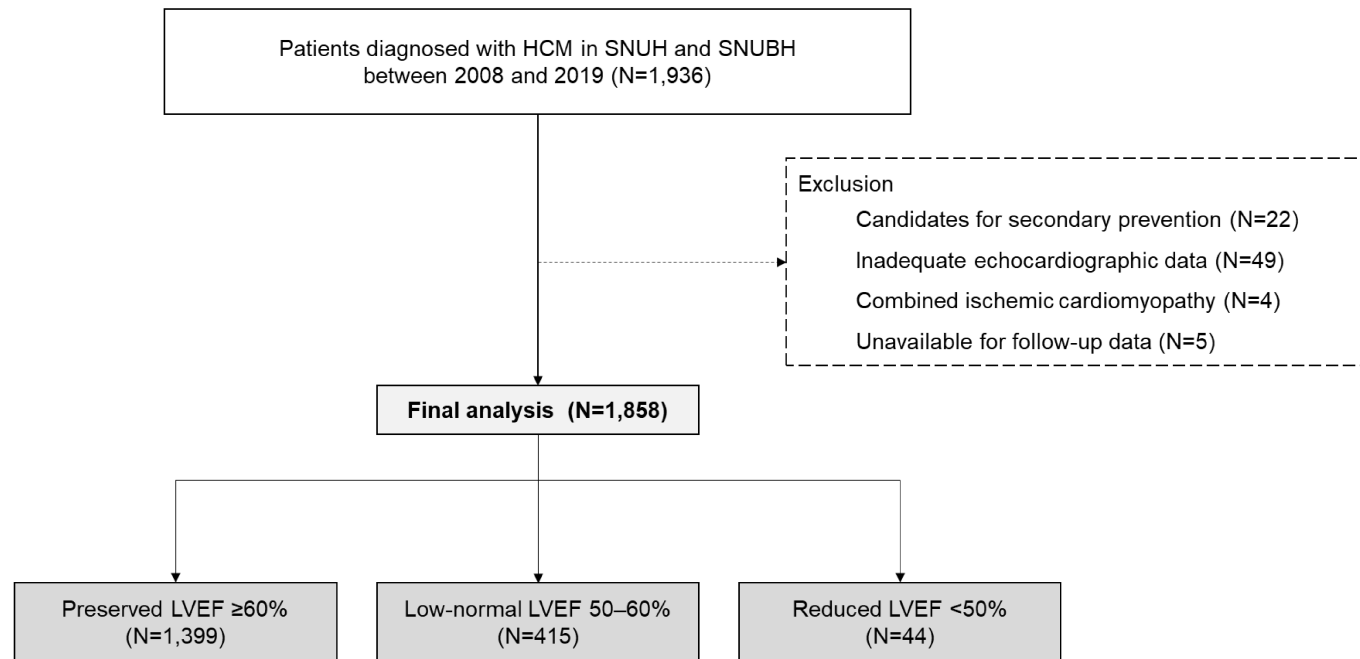**Supplemental Figure 1.** Flow chart of the study population

HCM, hypertrophic cardiomyopathy; LVEF, left ventricular ejection fraction; SNUH, Seoul National University Hospital; SNUBH, Seoul National University Boondang Hospital.

## Supplemental Tables

Supplemental Table 1. Annualized event rate according to LVEF category

| Outcomes                             | Annualized event rate (95% confidence interval) |                                 |                               |
|--------------------------------------|-------------------------------------------------|---------------------------------|-------------------------------|
|                                      | Preserved LVEF $\geq 60\%$<br>N=1,399           | Low-normal LVEF 50–60%<br>N=415 | Reduced LVEF $< 50\%$<br>N=44 |
| <b>Primary outcomes</b>              |                                                 |                                 |                               |
| Ventricular tachycardia/fibrillation | 0.41 (0.244–0.633)                              | 0.87 (0.449–1.518)              | 0.56 (0.809–7.606)            |
| Appropriate ICD shock                | 0.23 (0.117–0.420)                              | 0.29 (0.079–0.742)              | 1.49 (0.180–5.365)            |
| Sudden cardiac death                 | 0.02 (0.001–0.119)                              | 0.22 (0.045–0.635)              | 0.00 (0.000–0.000)            |
|                                      | 0.15 (0.060–0.308)                              | 0.36 (0.118–0.845)              | 1.49 (0.180–5.365)            |
| <b>Secondary outcomes</b>            |                                                 |                                 |                               |
| Hospitalization for heart failure    | 0.67 (0.455–0.951)                              | 1.79 (1.150–2.670)              | 5.31 (2.135–10.941)           |
| Cardiovascular death                 | 0.38 (0.227–0.604)                              | 1.08 (0.603–1.776)              | 2.14 (0.442–6.258)            |
| All-cause death                      | 1.38 (1.066–1.760)                              | 2.08 (1.394–2.990)              | 2.86 (0.778–7.310)            |

Abbreviations: LVEF, left ventricular ejection fraction; ICD, implantable cardioverter-defibrillator; SCD, sudden cardiac death.



**Supplemental Table 2.** Univariate Cox proportional hazard regression analysis for primary and secondary outcomes

| Variable                                        | Univariate analysis |              |        |
|-------------------------------------------------|---------------------|--------------|--------|
|                                                 | HR                  | 95% CI       | P      |
| <b>Primary outcomes (SCD/equivalent events)</b> |                     |              |        |
| LVEF, % ( <i>as a continuous variable</i> )     | 0.938               | 0.905–0.972  | <0.001 |
| Preserved LVEF $\geq 60\%$                      | 1.000               | (reference)  | -      |
| Low-normal LVEF 50–60%                          | 2.148               | 1.043–4.425  | 0.038  |
| Reduced LVEF <50%                               | 7.295               | 2.479–21.467 | <0.001 |
| Age, years                                      | 0.976               | 0.953–0.999  | 0.041  |
| Male                                            | 0.960               | 0.511–2.128  | 0.910  |
| Atrial fibrillation                             | 1.022               | 0.397–2.634  | 0.964  |
| Family history of SCD                           | 3.056               | 1.335–6.997  | 0.008  |
| Unexplained syncope                             | 3.718               | 1.785–7.740  | <0.001 |
| LA dimension, mm                                | 1.053               | 1.013–1.095  | 0.009  |
| LV-MWT, mm                                      | 1.025               | 0.940–1.117  | 0.578  |
| LVOTmaxPG, mmHg                                 | 1.005               | 0.996–1.014  | 0.281  |
| <b>Hospitalization for HF</b>                   |                     |              |        |
| LVEF, %                                         | 0.937               | 0.913–0.962  | <0.001 |
| Preserved LVEF $\geq 60\%$                      | 1.000               | (reference)  | -      |
| Low-normal LVEF 50–60%                          | 2.688               | 1.577–4.580  | <0.001 |
| Reduced LVEF <50%                               | 7.977               | 3.510–18.130 | <0.001 |
| Age, years                                      | 1.049               | 1.026–1.073  | <0.001 |
| Male, n (%)                                     | 0.382               | 0.232–0.630  | <0.001 |
| Atrial fibrillation                             | 2.627               | 1.518–4.548  | <0.001 |
| Family history of SCD                           | 1.049               | 0.421–2.618  | 0.918  |
| Unexplained syncope                             | 1.530               | 0.755–3.101  | 0.238  |
| LA dimension, mm                                | 1.092               | 1.062–1.122  | <0.001 |
| LV-MWT, mm                                      | 1.065               | 1.004–0.130  | 0.037  |
| LVOTmaxPG, mmHg                                 | 1.000               | 0.991–1.009  | 0.976  |
| <b>Cardiovascular death</b>                     |                     |              |        |
| LVEF, %                                         | 0.936               | 0.905–0.969  | <0.001 |
| Preserved LVEF $\geq 60\%$                      | 1.000               | (reference)  | -      |
| Low-normal LVEF 50–60%                          | 2.799               | 1.411–5.555  | 0.003  |
| Reduced LVEF <50%                               | 5.542               | 1.632–18.826 | 0.006  |
| Age, years                                      | 1.074               | 1.040–1.109  | <0.001 |
| Male, n (%)                                     | 0.477               | 0.248–0.916  | 0.026  |

|                            |       |             |        |
|----------------------------|-------|-------------|--------|
| Atrial fibrillation        | 2.059 | 0.969–4.379 | 0.061  |
| Family history of SCD      | 0.696 | 0.167–2.899 | 0.619  |
| Unexplained syncope        | 0.532 | 0.128–2.216 | 0.386  |
| LA dimension, mm           | 1.076 | 1.037–1.116 | <0.001 |
| LV-MWT, mm                 | 1.033 | 0.950–1.123 | 0.451  |
| LVOTmaxPG, mmHg            | 1.006 | 0.998–1.015 | 0.121  |
| <b>All-cause death</b>     |       |             |        |
| LVEF, %                    | 0.975 | 0.947–1.003 | 0.079  |
| Preserved LVEF $\geq 60\%$ | 1.000 | (reference) | -      |
| Low-normal LVEF 50–60%     | 1.510 | 0.975–2.339 | 0.065  |
| Reduced LVEF <50%          | 2.040 | 0.743–5.600 | 0.167  |
| Age, years                 | 1.078 | 1.057–1.100 | <0.001 |
| Male, n (%)                | 0.635 | 0.426–0.947 | 0.026  |
| Atrial fibrillation        | 2.004 | 1.265–3.176 | 0.003  |
| Family history of SCD      | 0.374 | 0.118–1.179 | 0.093  |
| Unexplained syncope        | 1.024 | 0.533–1.970 | 0.943  |
| LA dimension, mm           | 1.056 | 1.031–1.080 | <0.001 |
| LV-MWT, mm                 | 1.017 | 0.965–1.072 | 0.536  |
| LVOTmaxPG, mmHg            | 1.005 | 0.995–1.010 | 0.073  |

The primary outcome was a composite of SCD and equivalent events, including documented ventricular tachycardia/fibrillation, appropriate implantable cardioverter-defibrillator shocks, and aborted SCD. Abbreviations: CI, confidence interval; HR, hazard ratio; LA left atrium; LV, left ventricle; LVEF, LV ejection fraction; LVOTmaxPG, maximal LV outflow tract pressure gradient; LV-MWT, maximal LV wall thickness; SCD, sudden cardiac death.

**Supplemental Table 3.** Effect modification of age on primary and secondary outcomes

| <b>Variable</b>                                 | <b><i>P</i> for interaction</b> |
|-------------------------------------------------|---------------------------------|
| <b>Primary outcomes (SCD/equivalent events)</b> |                                 |
| LVEF, %                                         | 0.586                           |
| Preserved LVEF $\geq 60\%$                      | -                               |
| Low-normal LVEF 50–60%                          | 0.368                           |
| Reduced LVEF $< 50\%$                           | 0.678                           |
| <b>Hospitalization for HF</b>                   |                                 |
| LVEF, %                                         | 0.688                           |
| Preserved LVEF $\geq 60\%$                      |                                 |
| Low-normal LVEF 50–60%                          | 0.681                           |
| Reduced LVEF $< 50\%$                           | 0.079                           |
| <b>Cardiovascular death</b>                     |                                 |
| LVEF, %                                         | 0.718                           |
| Preserved LVEF $\geq 60\%$                      |                                 |
| Low-normal LVEF 50–60%                          | 0.878                           |
| Reduced LVEF $< 50\%$                           | 0.178                           |
| <b>All-cause death</b>                          |                                 |
| LVEF, %                                         | 0.233                           |
| Preserved LVEF $\geq 60\%$                      |                                 |
| Low-normal LVEF 50–60%                          | 0.341                           |
| Reduced LVEF $< 50\%$                           | 0.662                           |

Abbreviations: CI, confidence interval; HF, heart failure; HR, hazard ratio; LVEF, left ventricular ejection fraction; SCD, sudden cardiac death.

**Supplemental Table 4.** Cox proportional regression analysis for hospitalization for heart failure with mortality considered as a competing risk

| Variable                    | Univariate analysis |             |        | Multivariate analysis <sup>a</sup> |             |       |
|-----------------------------|---------------------|-------------|--------|------------------------------------|-------------|-------|
|                             | HR                  | 95% CI      | P      | HR                                 | 95% CI      | P     |
| <b>Categorical variable</b> |                     |             |        |                                    |             |       |
| LVEF category <sup>b</sup>  | 2.740               | 1.890–3.990 | <0.001 | 2.538                              | 1.639–3.930 | 0.001 |
| <b>Continuous variable</b>  |                     |             |        |                                    |             |       |
| LVEF, %                     | 0.937               | 0.912–0.963 | <0.001 | 0.941                              | 0.910–0.972 | 0.001 |

<sup>a</sup> Adjusted for age, gender, atrial fibrillation, left atrial size, and maximal wall thickness.

<sup>b</sup> LVEF category was LVEF  $\geq$ 60%, LVEF 50–60%, and LVEF <50%

Abbreviations: CI, confidence interval; HR, hazard ratio; LVEF, left ventricular ejection fraction.

**Supplemental Table 5.** The 5-year HCM Risk-SCD score stratified based on LVEF in 897 HCM patients with a complete dataset of seven risk factors

| Variable                                 | LV systolic function                |                                 |                               | P     |
|------------------------------------------|-------------------------------------|---------------------------------|-------------------------------|-------|
|                                          | Preserved LVEF $\geq 60\%$<br>N=681 | Low-normal LVEF 50–60%<br>N=194 | Reduced LVEF $< 50\%$<br>N=22 |       |
| <b>HCM Risk-SCD score, %<sup>a</sup></b> | 2.05 [1.40–3.35]                    | 2.37 [1.52–3.73]                | 2.55 [1.82–3.52]              | 0.019 |
| <b>HCM Risk-SCD category</b>             |                                     |                                 |                               | 0.109 |
| Low-risk ( $< 4\%$ )                     | 557 (81.8)                          | 147 (75.8)                      | 18 (81.8)                     |       |
| Intermediate-risk (4–6%)                 | 80 (11.7)                           | 25 (12.9)                       | 1 (4.5)                       |       |
| High-risk ( $\geq 6\%$ )                 | 44 (6.5)                            | 22 (2.5)                        | 3 (13.6)                      |       |

Continuous variables were presented as median [interquartile range], and categorical variables were presented as frequencies (percentages).

Abbreviations: HCM, hypertrophic cardiomyopathy; LV, left ventricular; LVEF, left ventricular ejection fraction; SCD, sudden cardiac death.

<sup>a</sup>Risk score was calculated by the 5-year HCM Risk-SCD model endorsed by the 2014 European Society of Cardiology guidelines on diagnosis and management of HCM.

**Supplemental Table 6.** Net reclassification index and integrated discrimination index for SCD/equivalent events <sup>a</sup>

| Variable                                                                | Model 1 |             |       | Model 2 |             |        | Model 3 |              |        |
|-------------------------------------------------------------------------|---------|-------------|-------|---------|-------------|--------|---------|--------------|--------|
|                                                                         | Value   | 95% CI      | P     | Value   | 95% CI      | P      | Value   | 95% CI       | P      |
| <b>HCM Risk-SCD category<sup>b</sup> plus LVEF (%)</b>                  |         |             |       |         |             |        |         |              |        |
| Net reclassification improvement                                        | 0.576   | 0.161–0.991 | 0.007 | 0.322   | 0.276–0.369 | <0.001 | 0.249   | 0.201–0.297  | <0.001 |
| Integrated discrimination improvement                                   | 0.041   | 0.004–0.078 | 0.029 | 0.018   | 0.001–0.037 | 0.049  | 0.009   | -0.005–0.019 | 0.064  |
| <b>HCM Risk-SCD category<sup>b</sup> plus LVEF category<sup>c</sup></b> |         |             |       |         |             |        |         |              |        |
| Net reclassification improvement                                        | 0.625   | 0.205–1.045 | 0.004 | 0.531   | 0.489–0.573 | <0.001 | 0.531   | 0.489–0.579  | <0.001 |
| Integrated discrimination improvement                                   | 0.042   | 0.003–0.081 | 0.035 | 0.021   | 0.001–0.042 | 0.040  | 0.013   | 0.007–0.025  | 0.038  |

Abbreviations: CI, confidence interval; HCM, hypertrophic cardiomyopathy; LVEF, left ventricular ejection fraction; SCD, sudden cardiac death.

Model 1 included 897 patients for whom all seven risk factors can be identified.

Model 2 included 1,614 patients without information on the presence or absence of NSVT. In this model, we put the missing value on NSVT as negative.

Model 3 included 1,614 patients without information on the presence or absence of NSVT. In this model, we put the missing value on NSVT as positive.

<sup>a</sup> SCD-equivalent events included documented ventricular tachycardia/fibrillation, appropriate implantable cardioverter-defibrillator shocks, and aborted SCD.

<sup>b</sup> HCM Risk-SCD category according to 2014 European Society of Cardiology guidelines; low risk (<4%), intermediate risk (4–6%), or high risk (≥6%).

<sup>c</sup> LVEF was classified into three categories; preserved LVEF (≥60%), low-normal LVEF (50–60%), and reduced LVEF (<50%).
